# Supplementary material for: Projected impact of fast-tracking of anti-retroviral treatment coverage on vertical transmission of HIV in India
Source: PubMed Central journal article supplement (PMC11410226; doi:10.1371/journal.pgph.0003702), 2024-09-18
Supplement: pgph.0003702.s004.pdf [file pgph.0003702.s004.pdf]

Supplementary Table S4. ART treatment coverage and retention rate during the projection period of 2023 to 2036, fast-track scenario (SC4)

| Subnational region     | 2022 | 2023 | 2024 | 2025 | 2026 | 2027 | 2028 | 2029 | 2030 |
|------------------------|------|------|------|------|------|------|------|------|------|
| Andhra Pradesh (AP)    | 86   | 89   | 92   | 95   | 95   | 95   | 95   | 95   | 95   |
| Arunachal Pradesh (AR) | 83   | 87   | 91   | 95   | 95   | 95   | 95   | 95   | 95   |
| Assam (AS)             | 54   | 68   | 81   | 95   | 95   | 95   | 95   | 95   | 95   |
| Bihar (BH)             | 27   | 50   | 72   | 95   | 95   | 95   | 95   | 95   | 95   |
| Chhattishgarh (CG)     | 74   | 81   | 88   | 95   | 95   | 95   | 95   | 95   | 95   |
| DELhi (DL)             | 78   | 84   | 89   | 95   | 95   | 95   | 95   | 95   | 95   |
| Goa (GO)               | 89   | 91   | 93   | 95   | 95   | 95   | 95   | 95   | 95   |
| Gujarat (GJ)           | 86   | 89   | 92   | 95   | 95   | 95   | 95   | 95   | 95   |
| Himachal Pradesh (HP)  | 66   | 76   | 85   | 95   | 95   | 95   | 95   | 95   | 95   |
| Haryana (HR)           | 88   | 90   | 93   | 95   | 95   | 95   | 95   | 95   | 95   |
| Jharkhand (JH)         | 71   | 79   | 87   | 95   | 95   | 95   | 95   | 95   | 95   |
| Jammu & Kashmir (JK)   | 44   | 61   | 78   | 95   | 95   | 95   | 95   | 95   | 95   |
| Karnataka (KA)         | 92   | 93   | 94   | 95   | 95   | 95   | 95   | 95   | 95   |
| Kerala (KE)            | 91   | 92   | 94   | 95   | 95   | 95   | 95   | 95   | 95   |
| Meghalaya (MG)         | 88   | 90   | 93   | 95   | 95   | 95   | 95   | 95   | 95   |
| Maharashtra (MH)       | 83   | 87   | 91   | 95   | 95   | 95   | 95   | 95   | 95   |
| Manipur (MN)           | 51   | 65   | 80   | 95   | 95   | 95   | 95   | 95   | 95   |
| Madhya Pradesh (MP)    | 95   | 95   | 95   | 95   | 95   | 95   | 95   | 95   | 95   |
| Mizoram (MZ)           | 85   | 88   | 92   | 95   | 95   | 95   | 95   | 95   | 95   |
| Nagaland (NG)          | 67   | 76   | 86   | 95   | 95   | 95   | 95   | 95   | 95   |
| Odisha (OD)            | 61   | 72   | 84   | 95   | 95   | 95   | 95   | 95   | 95   |
| Punjab (PJ)            | 95   | 95   | 95   | 95   | 95   | 95   | 95   | 95   | 95   |
| Rajasthan (RJ)         | 91   | 92   | 94   | 95   | 96   | 96   | 96   | 96   | 96   |
| Sikkim (SK)            | 87   | 90   | 92   | 95   | 95   | 95   | 95   | 95   | 95   |
| Tamil Nadu (TN)        | 89   | 91   | 93   | 95   | 95   | 95   | 95   | 95   | 95   |
| Tripura (TR)           | 72   | 80   | 87   | 95   | 96   | 96   | 96   | 96   | 96   |
| Uttarakhand (UK)       | 37   | 56   | 76   | 95   | 95   | 95   | 95   | 95   | 95   |
| Uttar Pradesh (UP)     | 83   | 87   | 91   | 95   | 95   | 95   | 95   | 95   | 95   |
| West Bengal (WB)       | 89   | 91   | 93   | 95   | 95   | 95   | 95   | 95   | 95   |
| Andaman & Nicobar (AN) | 56   | 69   | 82   | 95   | 95   | 95   | 95   | 95   | 95   |
| Chandigarh (CH)        | 95   | 95   | 95   | 95   | 95   | 95   | 95   | 95   | 95   |
| Dadra & Nagar          | 61   | 72   | 84   | 95   | 95   | 95   | 95   | 95   | 95   |
| Pondicherry (PO)       | 35   | 55   | 75   | 95   | 95   | 95   | 95   | 95   | 95   |
| Telegana (TL)          | 90   | 92   | 93   | 95   | 96   | 96   | 96   | 96   | 96   |
