# Supplementary material for: Projected impact of fast-tracking of anti-retroviral treatment coverage on vertical transmission of HIV in India
Source: PLOS Glob Public Health. 2024 Sep 18;4(9):e0003702. doi: 10.1371/journal.pgph.0003702 (PMC11410226; doi:10.1371/journal.pgph.0003702)
Supplement: S1 Table — (PDF) [file pgph.0003702.s001.pdf]

Supplementary Table S1. ART treatment coverage and retention rate during the projection period of 2023 to 2036, status quo scenario (SC1)

[illegible]
